# Supplementary material for: Chemical Composition of Different Extracts from Echinacea purpurea (L.) Moench Roots and Evaluation of Their Antimicrobial Activity
Source: MDPI journal article supplement (doi:10.3390/chemengineering7050094), 2023-10-09
Supplement: s1 [file s1]

Archive with 1 entries (1 files):
- ChemEngineering-2571787-SI.pdf
