# Supplementary material for: Chemical Composition of Different Extracts from Echinacea purpurea (L.) Moench Roots and Evaluation of Their Antimicrobial Activity
Source: MDPI journal article supplement (doi:10.3390/chemengineering7050094), 2023-10-09
Supplement: s1 [file s1 › ChemEngineering-2571787-SI.pdf]

## Supplementary Material

# Chemical composition of different extracts from *Echinacea purpurea* (L.) Moench roots and evaluation of their antimicrobial activity

Nadezhda Petkova <sup>1</sup>, Ani Petrova <sup>2</sup>, Ivan Ivanov <sup>1</sup>, Ivanka Hambarlyiska <sup>1</sup>, Yulian Tumbarski <sup>3</sup>, Ivayla Dincheva <sup>4</sup>, Manol Ognyanov <sup>2,\*</sup>, and Petko Denev <sup>2</sup>

<sup>1</sup> Department of Organic Chemistry and Inorganic Chemistry, Technological Faculty, University of Food Technologies, 26 Maritza Blvd., 4002 Plovdiv, Bulgaria;

<sup>2</sup> Laboratory of Biologically Active Substances, Institute of Organic Chemistry with Centre of Phytochemistry, Bulgarian Academy of Sciences, 139 Ruski Blvd., 4000 Plovdiv, Bulgaria;

<sup>3</sup> Department of Microbiology, University of Food Technologies, 26 Maritza Blvd., 4002, Plovdiv, Bulgaria;

<sup>4</sup> AgroBioInstitute, Agricultural Academy, 8 Dragan Tsankov Blvd., 1164 Sofia, Bulgaria;

\* Correspondence: manol.ognyanov@orgchm.bas.bg; Tel.: +359-32-642759

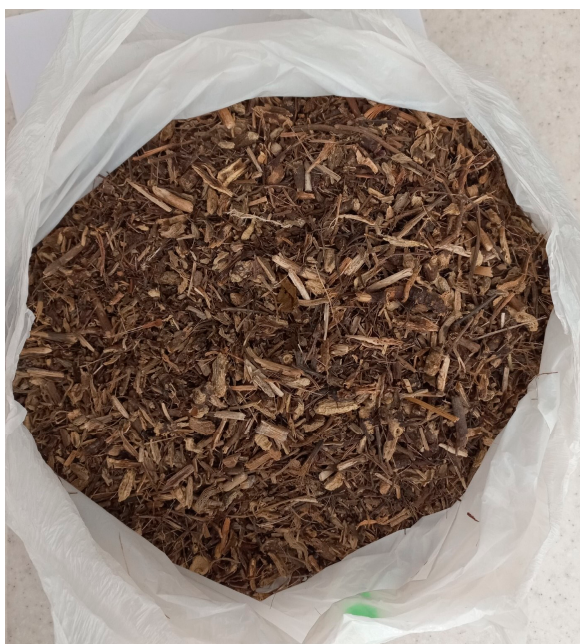

**Figure S1.** Picture of the plant material (*Echinacea* root) used for extraction in this study.

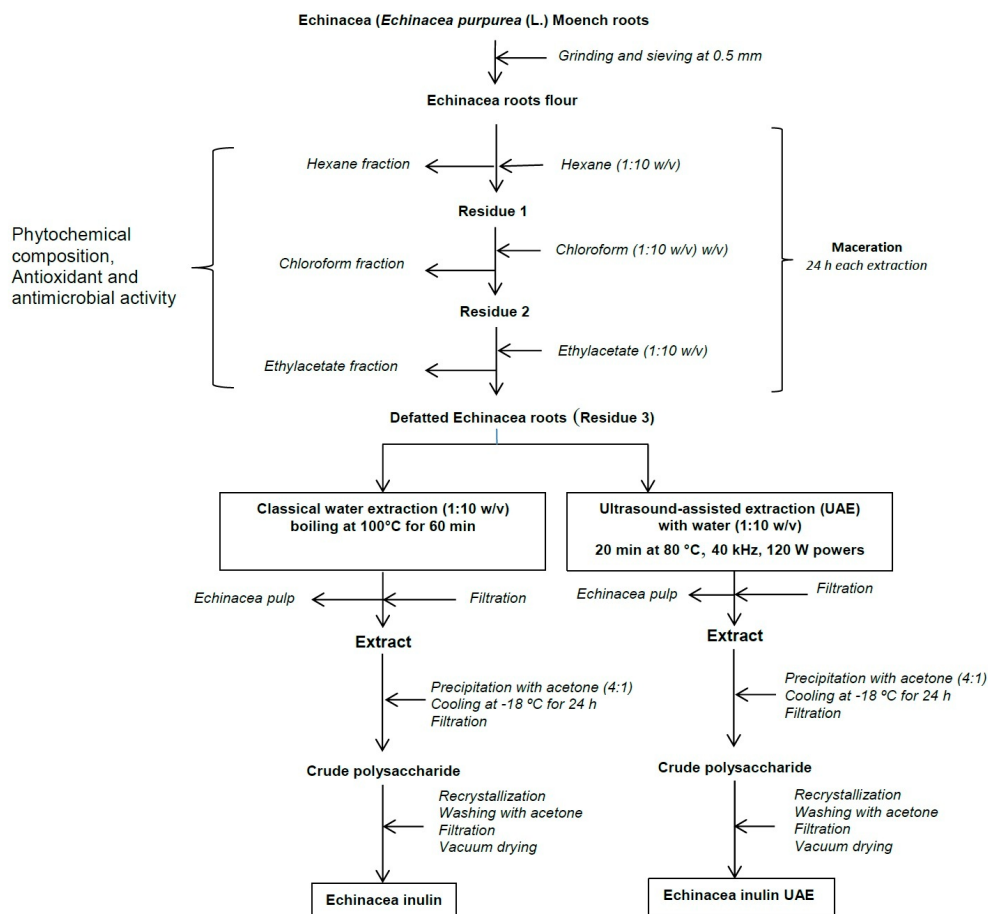

**Scheme S1.** Illustration of extract preparation from Echinacea roots.

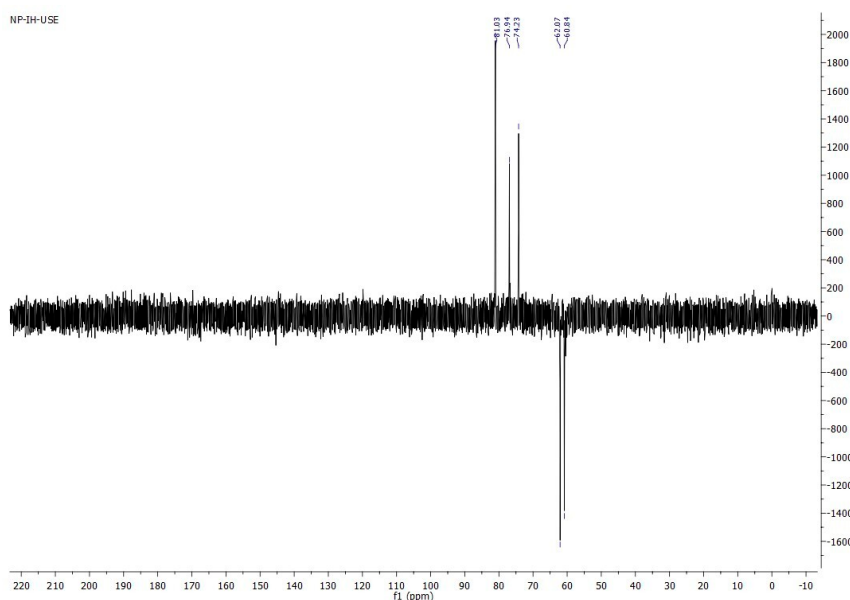

**Figure S2.** DEPT<sub>135</sub> NMR spectrum of inulin polysaccharide isolated from Echinacea root.
